# Supplementary material
Source: PubMed Central journal article supplement (PMC5247667)
Supplement: supp_M116.760371_III3C_Mathematica.pdf [file supp_M116.760371_III3C_Mathematica.pdf]

# Analysis of thiol reactivity data from III3C to determine open/close kinetics.

## Spectrophotometer Data

Importing SpecData at various [Urea] in .txt format :

```
FilePath = "/Users/riddhishah/Google
  Drive/Riddhi's Stuff/Final Data Collection/Data/III3C_110513/";
ProteinConc = "10uM";
ProteinName = "III3C";
UreaConc = {0, 0.5, 0.75, 1};
DTNBconc = 100;
Nureas = Length[UreaConc];
Nreps = {1, 1, 1, 1};
FileNames = Table[FilePath <> ProteinConc <> ProteinName <>
  "_" <> ToString[DTNBconc] <> "uMDTNB_" <> ToString[UreaConc[[i]]] <>
  "M_R" <> ToString[j] <> ".txt", {i, Nureas}, {j, Nreps[[i]]}];
RawSpecData = Table[Drop[Import[FileNames[[i, j]], "Data"], 2],
  {i, Nureas}, {j, Nreps[[i]]}];
RawSpecDataF = Table[Cases[RawSpecData[[i, j]], {_, _?NumericQ}, ∞],
  {i, Nureas}, {j, Nreps[[i]]}];
SpecDataSize = Table[Length[RawSpecDataF[[i, 1]]], {i, Nureas}];
SpecData = Table[Flatten[
  {RawSpecDataF[[i, 1, k, 1]], Table[RawSpecDataF[[i, j, k, 2]], {j, Nreps[[i]]}]},
  {i, Nureas}, {k, SpecDataSize[[i]]}];
NdatSpec = Table[Length[SpecData[[i]]], {i, Nureas}];
NrepsSpec =
  Table[Length[Select[SpecData[[i, NdatSpec[[i]]], # ≠ 0 &]] - 1, {i, Nureas}];
SpecDataRep = Table[{SpecData[[i, j, 1]], SpecData[[i, j, k + 1]]},
  {i, Nureas}, {k, Nreps[[i]]}, {j, NdatSpec[[i]]}];
Specall1 = Flatten[Table[Flatten[{k, DTNBconc, UreaConc[[i]], SpecDataRep[[i, k, j]]},
  {i, Nureas}, {k, Nreps[[i]]}, {j, NdatSpec[[i]]}], 1];
```

## 3D Plot of the imported Spec Data

```
ListPointPlot3D[Specall1[[All, All, 3 ;; 5]],
  PlotRange → {{0, 5}, {0, 1800}, {0, 0.14}},
  AxesLabel → {Urea - M, Time - sec, Absorbance - AU},
  PlotStyle → {Red, Brown, LightBlue, Gray, Pink, Cyan, Magenta, Yellow,
  Green, Orange, Purple, Lighter[Purple, 0.5], Lighter[Pink, 0.5],
  Lighter[Blue, 0.5], Lighter[Black, 0.75], Lighter[Brown, 0.3]}
```

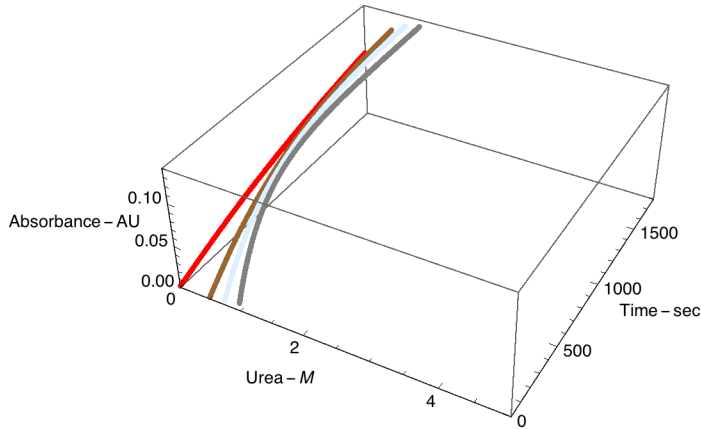

### Addition of time lag into the imported SpecData

```

tLag = 15;
NtransientsSpec = Total[NrepsSpec];
NrowsSpec = Table[Length[Specall1[[i]]], {i, NtransientsSpec}];
SpecFinal = Table[
  Flatten[{Specall1[[i, j, 1 ;; 3]], Specall1[[i, j, 4]] + tLag, Specall1[[i, j, 5]]}],
  {i, NtransientsSpec}, {j, NrowsSpec[[i]]}];
SwatchLabelsSpec = Table["DTNB=" <> ToString[Specall1[[i, 1, 2]]] <>
  "uM,Urea=" <> ToString[Specall1[[i, 1, 3]]] <> "M, Rep.No. " <>
  ToString[Specall1[[i, 1, 1]]], {i, NtransientsSpec}];

```

### Plot of the edited SpecData

```

ListPlot[SpecFinal[[All, All, 4 ;; 5]], PlotRange -> {0, Automatic},
  PlotLegends -> SwatchLegend[SwatchLabelsSpec],
  AxesLabel -> {Time - sec, Absorbance - AU},
  PlotStyle -> {Red, Brown, LightBlue, Gray, Pink, Cyan, Magenta, Yellow,
    Green, Orange, Purple, Lighter[Purple, 0.5], Lighter[Pink, 0.5],
    Lighter[Blue, 0.5], Lighter[Black, 0.75], Lighter[Brown, 0.3]}]

```

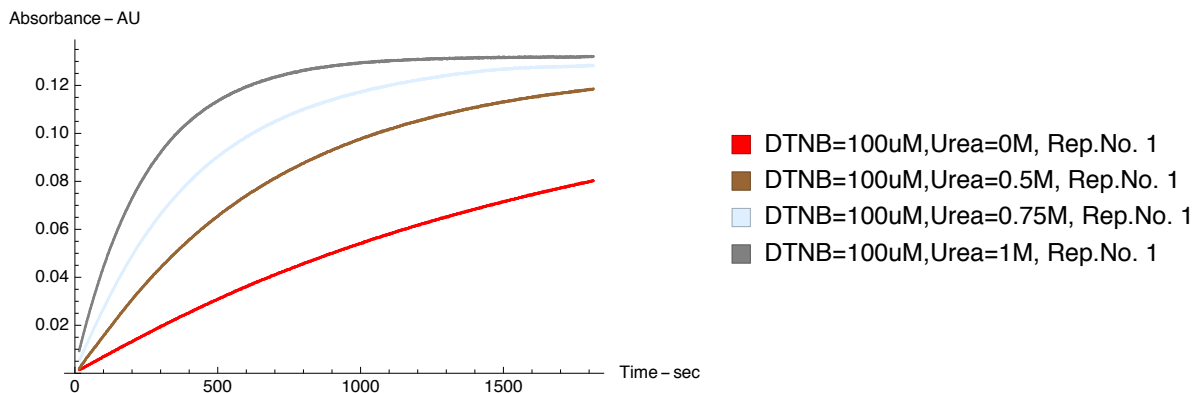

## Create a fittable dataset for the SpecData & Plot it -' FittableDataSpec'

```

NtransientsSpecall = Length[Specall1];
NdatSpecall = Table[Length[Specall1[[i]]], {i, NtransientsSpecall}];
FittableDataSpec = Flatten[Table[SpecFinal[[i, j, 2 ;; 5]],
    {i, 1, NtransientsSpecall}, {j, NdatSpecall[[i]]}], 1];
ListPlot[FittableDataSpec[[All, 3 ;; 4]], AxesLabel -> {Time - sec, Absorbance - AU}]

```

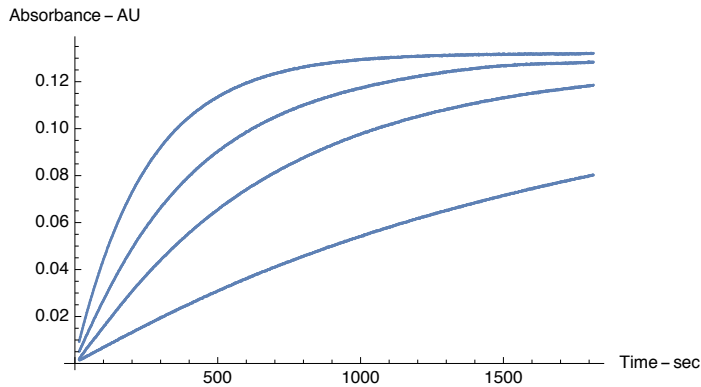

## Stop Flow Data

### Importing SF Data at various [Urea] & [DTNB] in .csv format

#### I. Importing SF Data from 100 uM DTNB :

```

FilePath = "/Users/ridhdhishah/Google
    Drive/Riddhi's Stuff/Final Data Collection/Data/III3C_110513/";
ProteinConc = "10uM";
ProteinName = "III3C";
DTNBconcl = 100;
UreaConcSF1 = {2, 3, 4, 8};
NureasSF1 = Length[UreaConcSF1];
FileNames =
    Table[FilePath <> ProteinConc <> ProteinName <> "_" <> ToString[DTNBconcl] <>
        "uMDTNB_" <> ToString[UreaConcSF1[[i]]] <> "M.csv", {i, NureasSF1}];
SFData = Table[Drop[Drop[Import[FileNames[[i]], "Data"], 29], -4], {i, NureasSF1}];
NdatSF = Table[Length[SFData[[i]]], {i, NureasSF1}];
NrepsSF =
    Table[Length[Select[SFData[[i, NdatSF[[i]]], # != 0 &]] - 1, {i, NureasSF1}];
SFDataRep = Table[{SFData[[i, j, 1]], SFData[[i, j, k + 1]]},
    {i, NureasSF1}, {k, NrepsSF[[i]]}, {j, NdatSF[[i]]}];
SFall1 = Flatten[Table[Flatten[{k, DTNBconcl, UreaConcSF1[[i]], SFDataRep[[i, k, j]]}],
    {i, NureasSF1}, {k, NrepsSF[[i]]}, {j, NdatSF[[i]]}], 1];
NtransientsSF = Total[NrepsSF];
NrowsSF = Table[Length[SFall1[[i]]], {i, NtransientsSF}];

```

3D Plot of the imported 100uM DTNB SF Data

```
ListPointPlot3D[SFall1[[All, All, 3 ;; 5]],
  PlotRange → Full, AxesLabel → {Urea - M, Time - sec, Absorbance - AU}]
```

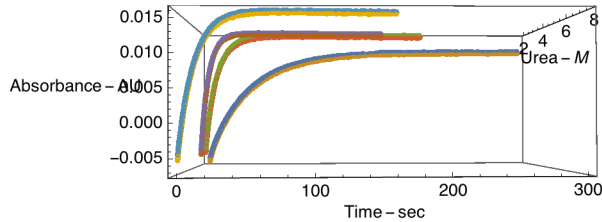2D Plot of the imported 100uM DTNB SF Data

```
SwatchLabels = Table["Urea]=" <> ToString[SFall1[[i, 1, 3]]] <>
  "M, Rep.No. " <> ToString[SFall1[[i, 1, 1]]] <> ", DTNB=" <>
  ToString[SFall1[[i, 1, 2]]] <> "uM", {i, NtransientsSF}];
ListPlot[SFall1[[All, All, 4 ;; 5]], PlotRange → Full,
  PlotLegends → SwatchLegend[SwatchLabels], AxesLabel → {Time - sec, Absorbance - AU},
  PlotStyle → {LightRed, Red, LightBlue, Blue, LightGreen, Green, LightYellow, Yellow}]
```

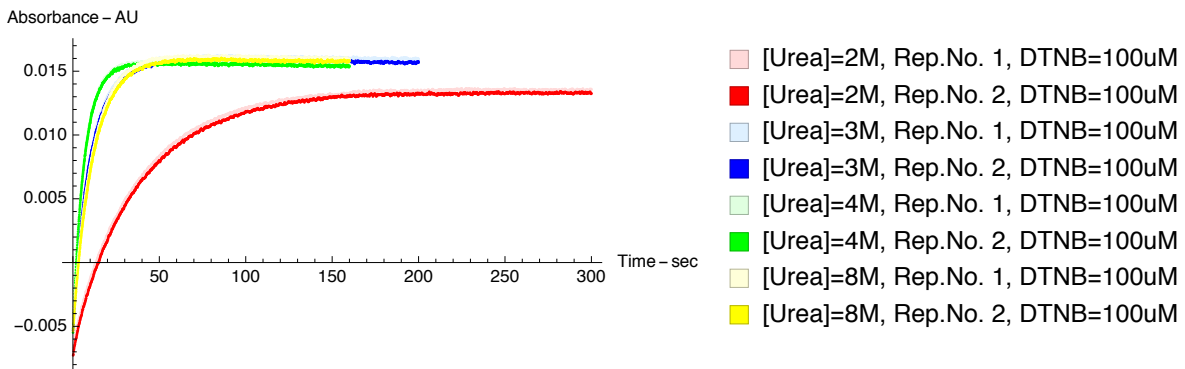Ensuring that all SF Data for 100uM DTNB starts at time = 0

```
SFfinal1 =
  Table[Flatten[{SFall1[[i, j, 1 ;; 4]], 6.25 (SFall1[[i, j, 5]] - SFall1[[i, 1, 5]])}],
    {i, NtransientsSF}, {j, NrowsSF[[i]]}];
```

Plot of edited SF Data for 100uM DTNB

```
ListPlot[SFfinal1[[All, All, 4 ;; 5]], PlotRange → Automatic,
  PlotLegends → SwatchLegend[SwatchLabels], AxesLabel → {Time - sec, Absorbance - AU},
  PlotStyle → {LightRed, Red, LightBlue, Blue, LightGreen, Green, LightYellow, Yellow}]
```

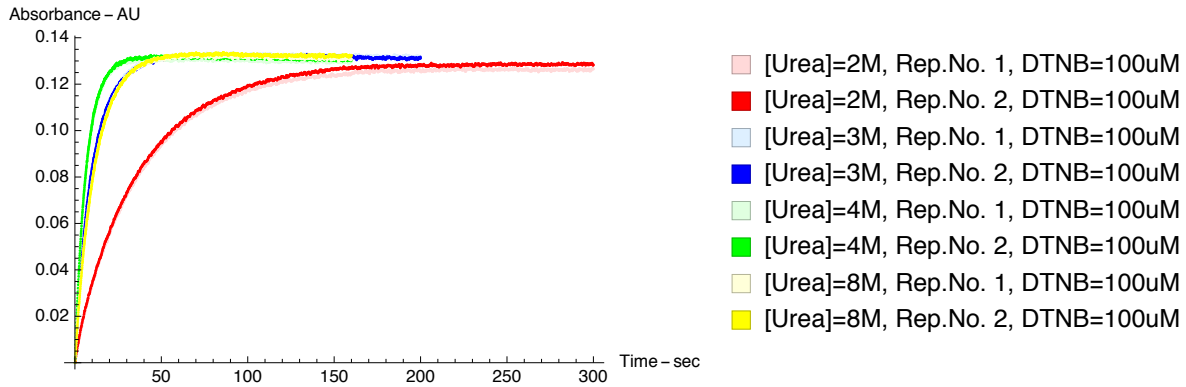

ListPlot::prng: Value of option PlotRange -> {Automatic} is not All,  
Full, Automatic, a positive machine number, or an appropriate list of range specifications. >>

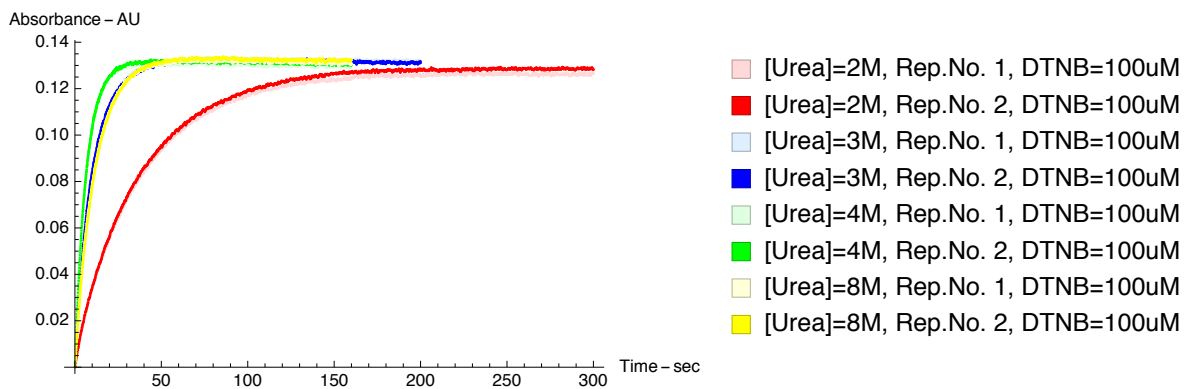

## 2. Importing SF Data from 195 uM DTNB :

```
(*Import data from stopped flow*)
FilePath = "/Users/riddhishah/Google
Drive/Riddhi's Stuff/Final Data Collection/Data/III3C_110513/";
ProteinConc = "10uM";
ProteinName = "III3C";
DTNBconc2 = 195;
UreaConcSF2 = {8};
NureasSF2 = Length[UreaConcSF2];
FileNames =
Table[FilePath <> ProteinConc <> ProteinName <> "_" <> ToString[DTNBconc2] <>
"uMDTNB_" <> ToString[UreaConcSF2[[i]]] <> "M.csv", {i, NureasSF2}];
SFData2 = Table[Drop[Drop[Import[FileNames[[i]], "Data", 29], -4], {i, NureasSF2}];
NdatSF2 = Table[Length[SFData2[[i]]], {i, NureasSF2}];
NrepsSF2 =
Table[Length[Select[SFData2[[i, NdatSF2[[i]]], # <= 0 &]] - 1, {i, NureasSF2}];
SFDataRep2 = Table[{SFData2[[i, j, 1]], SFData2[[i, j, k + 1]]},
{i, NureasSF2}, {k, NrepsSF2[[i]]}, {j, NdatSF2[[i]]}];
Sfall2 = Flatten[Table[Flatten[{k, DTNBconc2, UreaConcSF2[[i]], SFDataRep2[[
i, k, j]]}], {i, NureasSF2}, {k, NrepsSF2[[i]]}, {j, NdatSF2[[i]]}, 1];
NtransientsSF2 = Total[NrepsSF2];
NrowsSF2 = Table[Length[Sfall2[[i]]], {i, NtransientsSF2}];
```

3D Plot of the imported 195uM DTNB SF Data

```
ListPointPlot3D[SFall2[[All, All, 3 ;; 5]], PlotRange -> Full,
  AxesLabel -> {Urea - M, Time - sec, Absorbance - AU}]
```

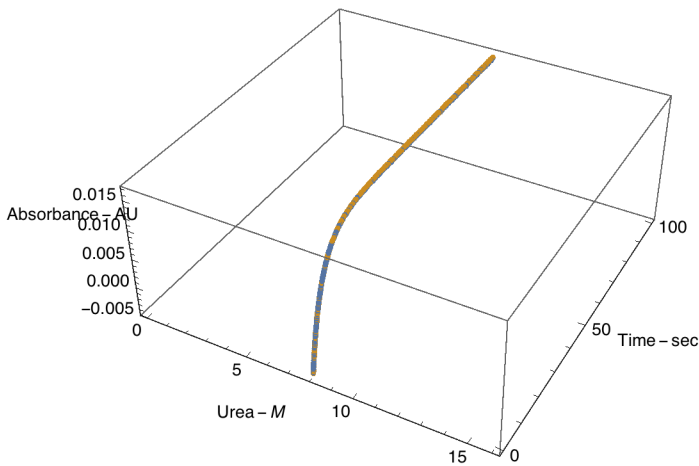2D Plot of the imported 195uM DTNB SF Data

```
SwatchLabels2 = Table[" [Urea]=" <> ToString[SFall2[[i, 1, 3]]] <>
  "M, Rep.No. " <> ToString[SFall2[[i, 1, 1]]] <> ", DTNB=" <>
  ToString[SFall2[[i, 1, 2]]] <> "uM", {i, NtransientsSF2}];
ListPlot[SFall2[[All, All, 4 ;; 5]], PlotRange -> Full,
  PlotLegends -> SwatchLegend[SwatchLabels2],
  AxesLabel -> {Time - sec, Absorbance - AU}, PlotStyle -> {LightPink, Pink}]
```

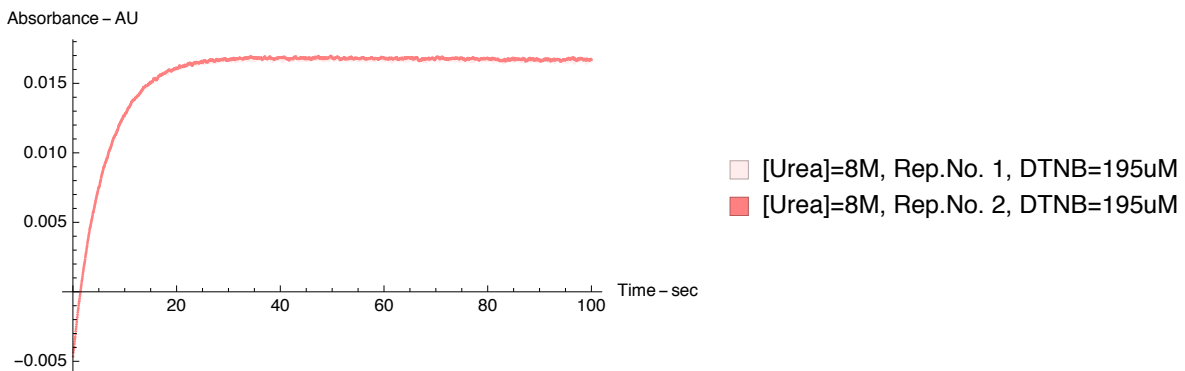Ensuring that all SF Data for 195uM DTNB starts at time = 0

```
SFfinal2 =
  Table[Flatten[{SFall2[[i, j, 1 ;; 4]], 6.25 (SFall2[[i, j, 5]] - SFall2[[i, 1, 5]])}],
  {i, NtransientsSF2}, {j, NrowsSF2[[i]]}];
```

### Plot of edited SF Data for 390uM DTNB

```
ListPlot[SFFinal2[[All, All, 4 ;; 5]],
  PlotRange -> {0, 0.15}, PlotLegends -> SwatchLegend[SwatchLabels2],
  PlotStyle -> {LightPink, Pink}, AxesLabel -> {Time - sec, Absorbance - AU}]
```

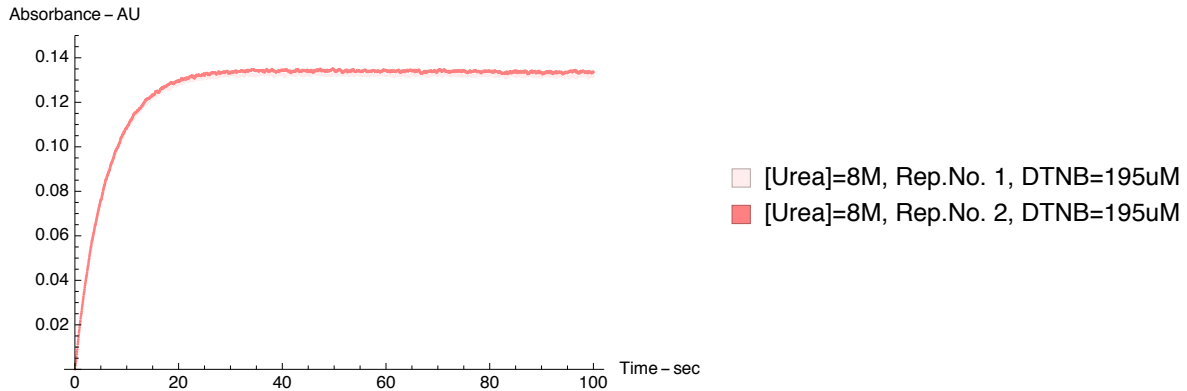

### Combine and Plot all SFData - 'SFAllData'

```
SFAllData = Join[SFFinal1, SFFinal2];
NdatSFAllData = Length[SFAllData];
SwatchLabelsall = Table["[Urea]=" <> ToString[SFAllData[[i, 1, 3]]] <>
  "M, Rep.No. " <> ToString[SFAllData[[i, 1, 1]]] <> ", DTNB=" <>
  ToString[SFAllData[[i, 1, 2]]] <> "uM", {i, NdatSFAllData}];
ListPlot[SFAllData[[All, All, 4 ;; 5]], PlotRange -> Full,
  PlotLegends -> SwatchLegend[SwatchLabelsall],
  PlotStyle -> {LightRed, Red, LightBlue, Blue, LightGreen, Green, LightYellow,
  Yellow, LightPink, Pink}, AxesLabel -> {Time - sec, Absorbance - AU}]
```

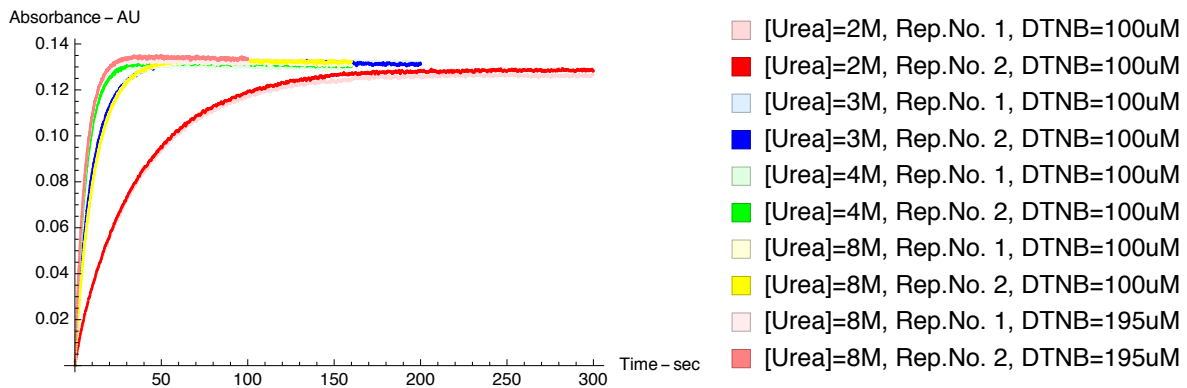

### Create a fittable dataset for SFData & Plot it - 'FittableDataSF'

```
Ntransients = Length[SFAllData];
NdatAll = Table[Length[SFAllData[[i]]], {i, Ntransients}];
FittableDataSF =
  Flatten[Table[SFAllData[[i, j, 2 ;; 5]], {i, Ntransients}, {j, NdatAll[[i]]}], 1];
ListPlot[FittableDataSF[[All, 3 ;; 4]]]
```

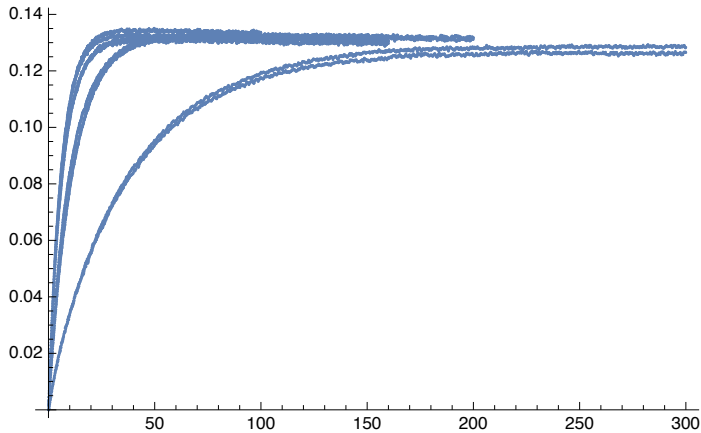

## Data fitting

Combine Spec & SF Data :

```
AllData = Join[SpecFinal, SFAllData];
NtransientsAll = Length[AllData];
NdatAllData = Length[AllData];
LabelsAllData = Table[ToString[AllData[[i, 1, 3]]] <> "M-" <>
  ToString[AllData[[i, 1, 2]]] <> "uM" <> "DTNB", {i, NdatAllData}];
III3Cplot = ListPlot[AllData[[All, All, 4 ;; 5]],
  AxesLabel -> {Time - sec, Absorbance - AU}, PlotLabel -> "III3C",
  PlotStyle -> {LightRed, LightBlue, LightGreen, Yellow, Magenta,
    Magenta, Orange, Orange, Gray, Gray, Brown, Brown, Red, Red},
  PlotLegends -> SwatchLegend[LabelsAllData]]
```

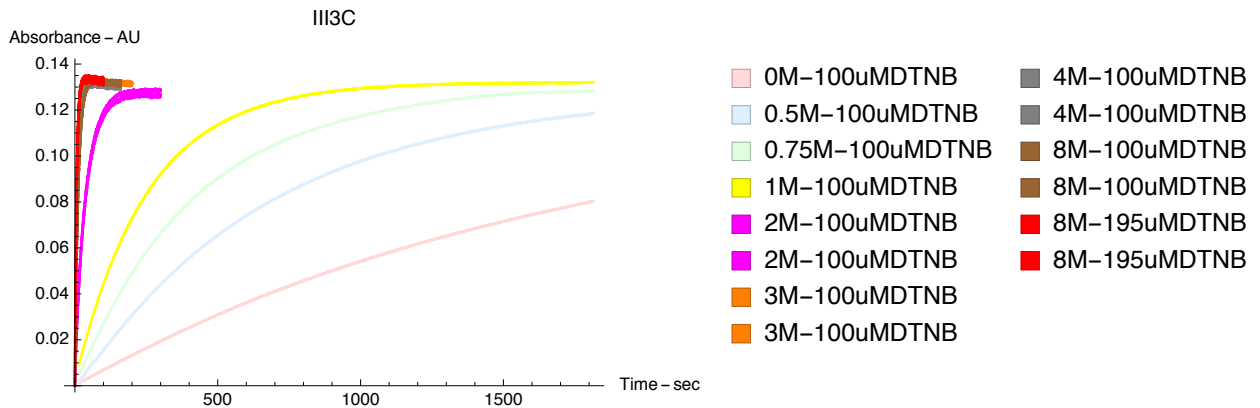

Create a fittable dataset for Spec & SF Data - 'AllFittableData' :

```
AllFittableData = Join[FittableDataSF, FittableDataSpec];
ListPlot[AllFittableData[[All, 3 ;; 4]], AxesLabel -> {Time - sec, Absorbance - AU}]
```



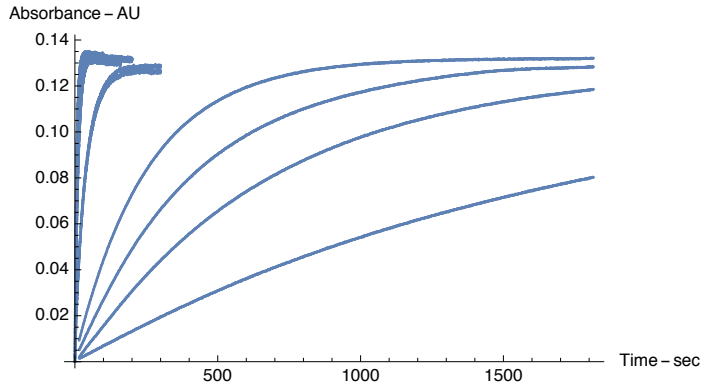

```
Export["AllfittableData3C.csv", AllFittableData, "Data"];
```

Model for fitting the data :

```
Signal[Rconc_, Uconc_, t_] := Module[{kop, kcl, kchem},

  kop = Exp[Log[kop0] + mop * Uconc];
  kcl = Exp[Log[kcl0] + mcl * Uconc];
  kchem = Exp[Log[kchem0] - 0.1 * Uconc];

  RateMatrix = 
$$\begin{pmatrix} -kop & kcl & 0 \\ kop & -kcl - kchem * Rconc * 10^{-6} & 0 \\ 0 & kchem * Rconc * 10^{-6} & 0 \end{pmatrix};$$


  λvector = Eigenvalues[RateMatrix];
  Bmatrix = Transpose[Eigenvectors[RateMatrix]];
  InvBmatrix = Inverse[Bmatrix];
  ExpΔmatrix = DiagonalMatrix[Exp[λvector t]];
  Keq = kop / kcl;
  P0 = {1 / (1 + Keq), Keq / (1 + Keq), 0};
  P = Bmatrix . ExpΔmatrix . InvBmatrix . P0;
  P[[3]] AbsMax]
```

Simulate fit of ' Combined SF & Spec Data to obtain the initial kop, kcl, mop, mcl, kchem & AbsMax values.

```
kop0 = 0.0009;
kcl0 = 0.2;
mcl = -0.9;
mop = 1.4;
kchem0 = 1000;
AbsMax = 14 000 × 10-5;

Plot[Signal[100, 1, t], {t, 0, 1800},
  PlotRange → {{0, 1800}, {0, 0.2}}, AxesLabel → {Time - sec, Absorbance - AU}]
```

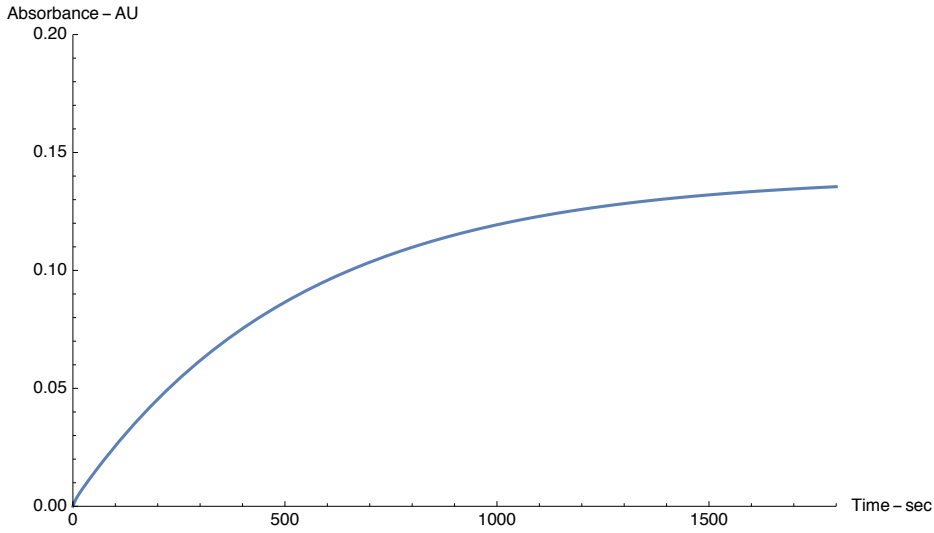

```
Plot[{Signal[100, 0, t], Signal[100, 0.5, t], Signal[100, 0.75, t], Signal[100, 1, t],
      Signal[100, 2, t], Signal[100, 3, t], Signal[100, 4, t], Signal[100, 8, t]},
     {t, 0, 1800}, PlotRange -> {{0, 1800}, {0, 0.2}},
     AxesLabel -> {Time - sec, Absorbance - AU},
     PlotStyle -> {Red, Brown, LightBlue, Gray, Cyan, Yellow, Orange, Lighter[Brown, 0.3]]}
```

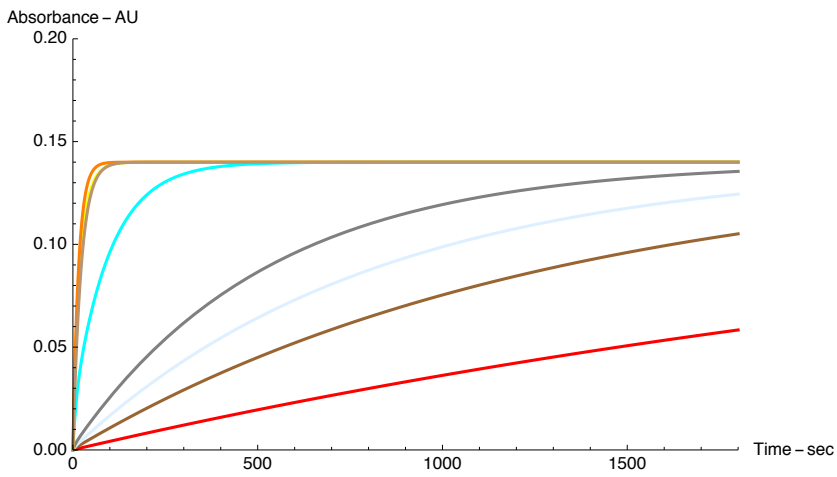

Global fitting of the data to obtain the initial kop, kcl, mop, mcl, kchem & AbsMax values.

```
Unset[{kop0, kcl0, mcl, mop, kchem0, AbsMax, Rconc, Uconc, t}];
kop0init = 0.001;
kcl0init = 0.3;
mclinit = -1.00;
mopinit = 1.00;
kchem0init = 1000;
AbsMaxinit = 13 000 × 10-5;
Dynamic[{ev, st, kop0, kcl0, mcl, mop, kchem0, AbsMax}]
ev = 0; st = 0;
GlobalFit = NonlinearModelFit[AllFittableData, {Signal[Rconc, Uconc, t]
  (*,mcl<0&&mop>0&&kop0>0&&kcl0>0&&kchem>0*)},
  {{kop0, kop0init}, {kcl0, kcl0init}, {mcl, mclinit}, {mop, mopinit},
  {kchem0, kchem0init}, {AbsMax, AbsMaxinit}}, {Rconc, Uconc, t},
  MaxIterations → 1000 (*{Method→"NMinimize",Method→"SimulatedAnnealing"}*)];
```

## Parameter listing & analysis

Peek at best fit parameter values without doing error analysis

```
GlobalFit["BestFitParameters"]
{kop0 → 0.00189692, kcl0 → 0.549814, mcl → -0.779821,
 mop → 1.53215, kchem0 → 2074.45, AbsMax → 0.131449}
```

```
GlobalFit["ParameterConfidenceIntervalTable"]
```

Estimate standard error, t-statistic & P-values for each parameter (slow!)

```
Unset[{kop0, kcl0, mcl, mop, kchem0, AbsMax}];
GlobalFit["ParameterTable"]
```

Compute parameter correlation coefficients (slow!) Magnitudes  $> \pm 0.9$  indicate pairs parameters for whom changing one parameter value can be compensated for by a change in the other, with no reduction in goodness of fit. In other words, the values of both parameters are poorly determined, regardless of their estimated standard errors.

```
Unset[{kop0, kcl0, mcl, mop, kchem0, AbsMax}];
TableForm[Round[GlobalFit["CorrelationMatrix"], 0.01],
  TableHeadings → {{ "kop0", "kcl0", "mcl", "mop", "kchem0", "AbsMax" },
  { "kop0", "kcl0", "mcl", "mop", "kchem0", "AbsMax" }}]
```

|        | kop0  | kcl0  | mcl   | mop   | kchem0 | AbsMax |
|--------|-------|-------|-------|-------|--------|--------|
| kop0   | 1.    | 1.    | -0.79 | -0.86 | 0.07   | -0.08  |
| kcl0   | 1.    | 1.    | -0.79 | -0.85 | 0.12   | -0.09  |
| mcl    | -0.79 | -0.79 | 1.    | 0.99  | 0.1    | -0.02  |
| mop    | -0.86 | -0.85 | 0.99  | 1.    | 0.06   | -0.02  |
| kchem0 | 0.07  | 0.12  | 0.1   | 0.06  | 1.     | -0.32  |
| AbsMax | -0.08 | -0.09 | -0.02 | -0.02 | -0.32  | 1.     |

Determine the 'RSquared' value for the globalfit. The closer the result is to one the better the fit.

```
Unset[{kop0, kc10, mc1, mop, kchem0, AbsMax}];
GlobalFit["RSquared"]
0.999776
```

Determine the 'BIC' value for the fits. This parameter checks the model. It punishes you for added parameters in the model.

```
Unset[{kop0, kc10, mc1, mop, kchem0, AbsMax}];
GlobalFit["BIC"]
-268 017.
```

Apply best fit parameter values to each parameter variable so that they can be used for further analysis

```
kop0 = GlobalFit["BestFitParameters"][[1, 2]];
kc10 = GlobalFit["BestFitParameters"][[2, 2]];
mc1 = GlobalFit["BestFitParameters"][[3, 2]];
mop = GlobalFit["BestFitParameters"][[4, 2]];
kchem0 = GlobalFit["BestFitParameters"][[5, 2]];
AbsMax = GlobalFit["BestFitParameters"][[6, 2]];
```

Plot data and fitted Signal(t) transients to visualize goodness of fit

```
FitPlot = Table[
  LogLinearPlot[Signal[AllData[[i, 1, 2]], AllData[[i, 1, 3]], t], {t, 0.001, 1800},
  PlotStyle -> {Black, Thick}, PlotRange -> Full], {i, NtransientsAll}];
Table[Show[ListLogLinearPlot[AllData[[i, All, 4 ;; 5]],
  PlotLabel -> LabelsAllData[[i]], PlotRange -> Full, PlotStyle -> {Red, Thick}],
  FitPlot[[i]]], {i, NtransientsAll}]
```

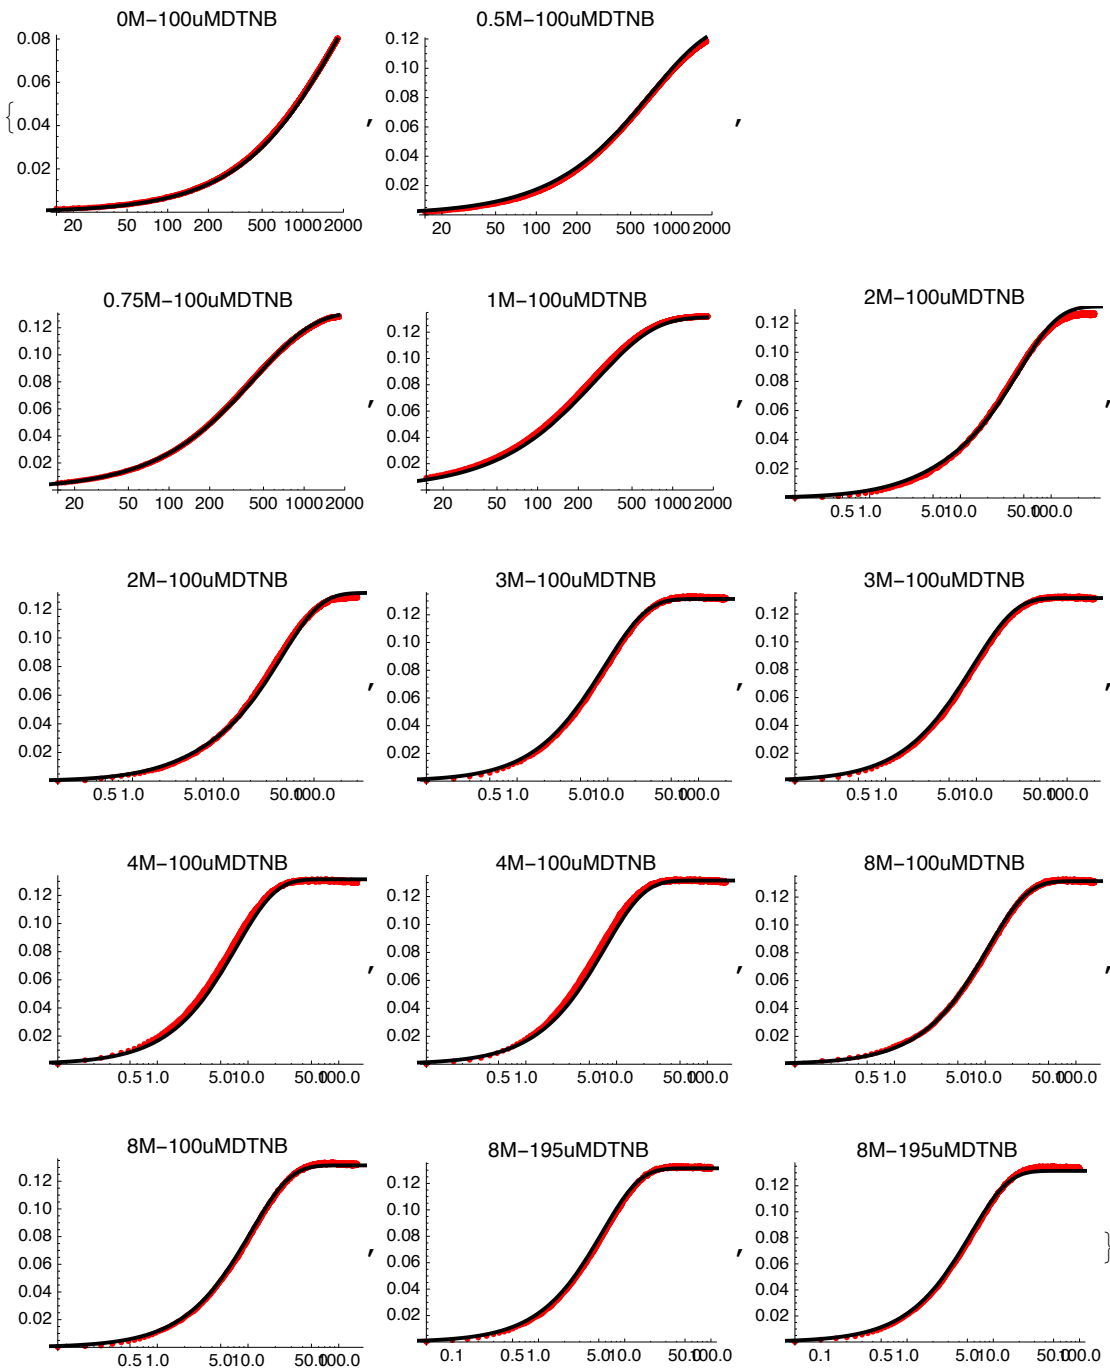

```
FitPlot =  
  LogLinearPlot[{Table[Signal[100, Uconc, t], {Uconc, {0, 0.5, 0.75, 1, 2, 3, 4, 8}}],  
    Signal[195, 8, t]}, {t, .1, 1000}, PlotStyle -> {{Dotted, Black}}];  
DataPlot = ListLogLinearPlot[AllFittableData[All, 3 ;; 4],  
  PlotRange -> All, PlotStyle -> {{LightGreen}}];  
Show[DataPlot, FitPlot]
```

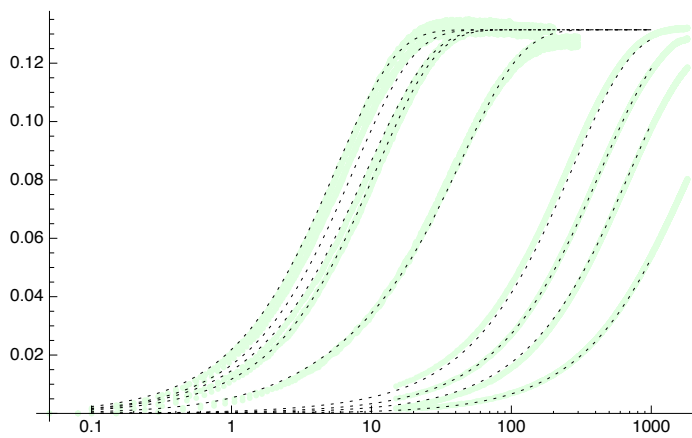

```

FitPlots = Table[Plot[Signal[AllData[[i, 1, 2]], AllData[[i, 1, 3]], t], {t, 0, 1800},
  PlotStyle -> {Black, Thick}, PlotRange -> Full], {i, NtransientsAll}];
Table[Show[ListPlot[AllData[[i, All, 4 ;; 5]], PlotRange -> {Automatic},
  PlotLabel -> LabelsAllData[[i]], FitPlots[[i]]], {i, NtransientsAll}]

```

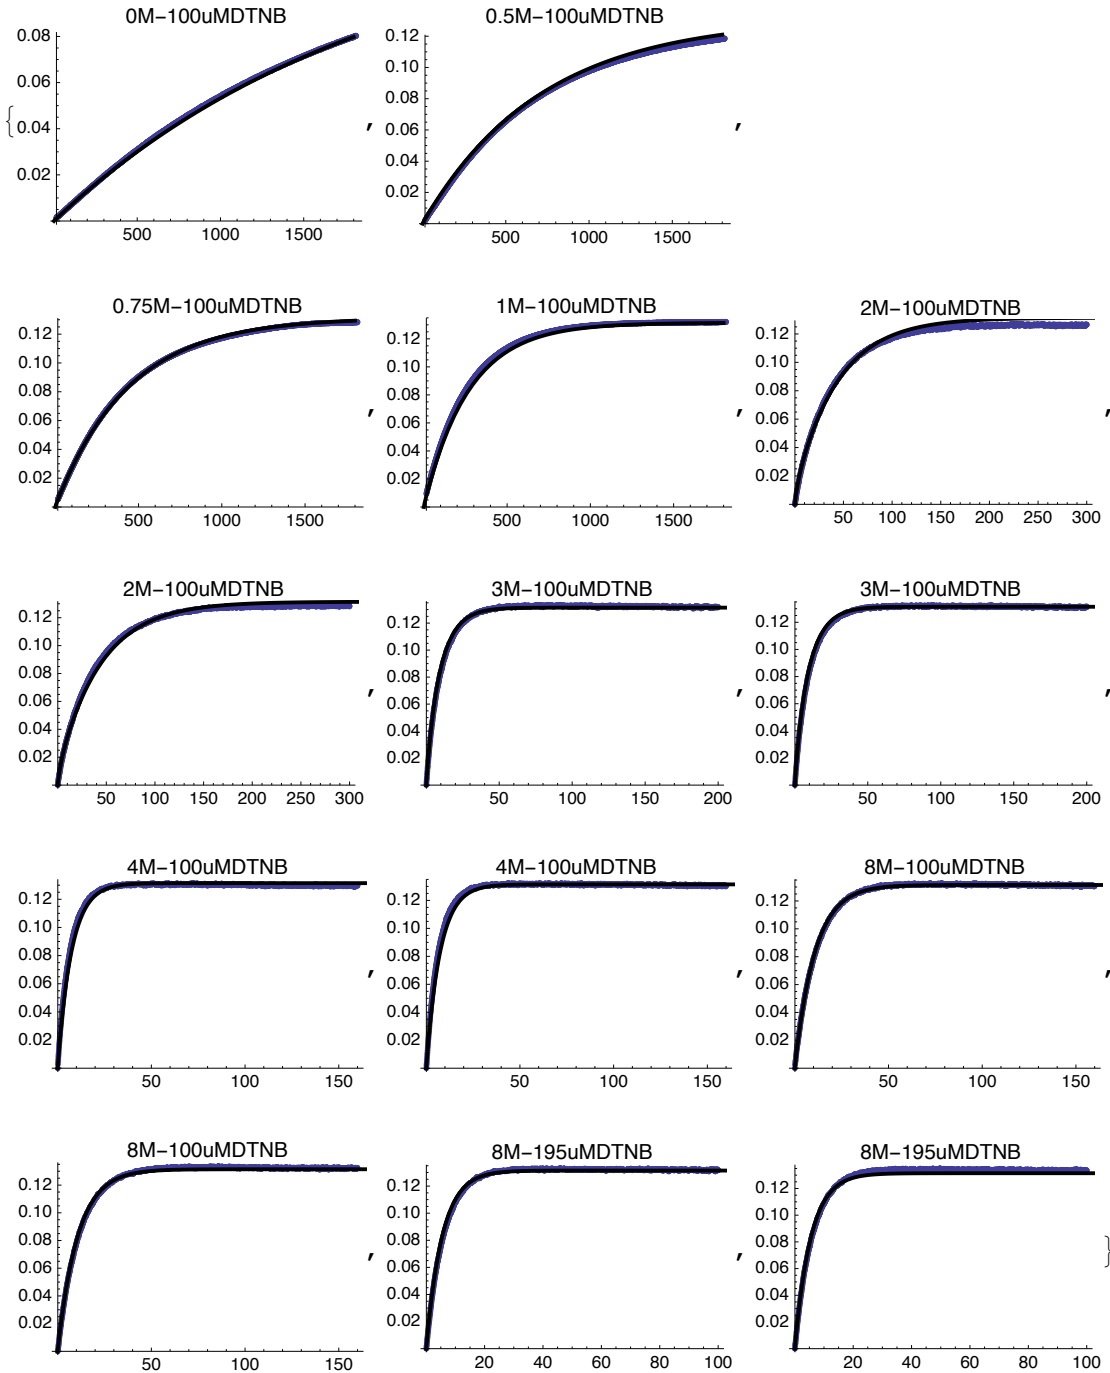

## Figure for research paper

```

Forpaper3CFig8SF1 = Drop[SFAAllData, {1, 6, 2}];
Forpaper3CFig8SF = Drop[Forpaper3CFig8SF1, -3];
Forpaper3CSF = Forpaper3CFig8SF;
NdatForpaper3CSF = Length[Forpaper3CSF];
SwatchLabelsForpaper3CSF =
  Table[ToString[Forpaper3CSF[[i, 1, 3]]] <> "M ", {i, 4}];
Forpaper3CSFfig = ListPlot[Forpaper3CSF[[1 ;; 4, All, 4 ;; 5]],
  PlotRange -> {{0, 300}, {0, 0.14}}, (*PlotLegends->Placed[SwatchLegend[
  SwatchLabelsForpaper3CSF, LegendLayout->"Row"], {{0.4, -0.2}, {0.4, -0.2}}], *)
  PlotStyle -> {Cyan, Yellow, Orange, Lighter[Brown, 0.3], Lighter[Purple, 0.5],
  Lighter[Blue, 0.5], Lighter[Brown, 0.3], Red, Blue, Yellow},
  AxesLabel -> {Time - sec, Absorbance - AU}, Frame -> True,
  FrameLabel -> {"Time (s)", "Absorbance" (*, "FNIII 3C Stopflow data "*)},
  LabelStyle -> {{FontFamily -> "Arial"}, 12},
  FrameTicks -> {Automatic, Automatic, None, None}];
FitPlotsForpaper3CSF = Plot[{Signal[Forpaper3CSF[[1, 1, 2]], Forpaper3CSF[[1, 1, 3]],
  t], Signal[Forpaper3CSF[[2, 1, 2]], Forpaper3CSF[[2, 1, 3]], t],
  Signal[Forpaper3CSF[[3, 1, 2]], Forpaper3CSF[[3, 1, 3]], t],
  Signal[Forpaper3CSF[[4, 1, 2]], Forpaper3CSF[[4, 1, 3]], t]}, {t, 0, 300},
  PlotStyle -> {{Dotted, Black}} (*, {Dashing[Large], Black}, {Dashed, Black},
  {Dashing[Tiny], Black}, {DotDashed, Black}, {Dashing[{Large}], Black},
  {Dashing[{Small, Large}], Black} *) , PlotRange -> Full (*, PlotLegends->
  Placed[LineLegend[{"Fit"}, LegendLayout->"Row"], {{0.88, 0.01}, {0.4, 0.01}}] *)];
FigIII3CSF = Show[Forpaper3CSFfig, FitPlotsForpaper3CSF]

```

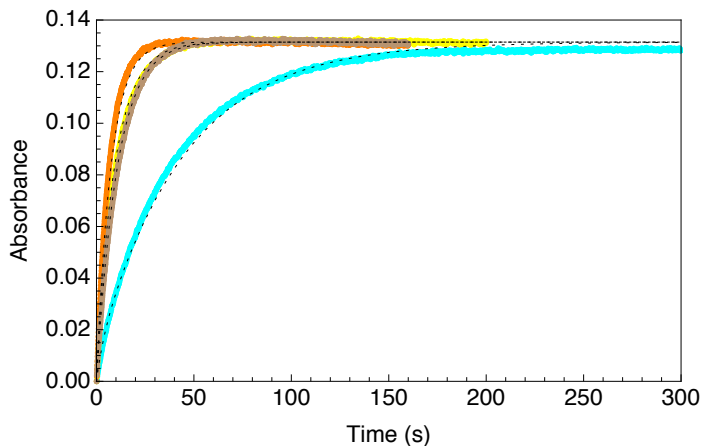



```

Forpaper3CSpec = SpecFinal;
NdatForpaper3CSpec = Length[Forpaper3CSpec];
SwatchLabelsForpaper3CSpec =
  Table[ToString[Forpaper3CSpec[[i, 1, 3]]] <> "M", {i, 4}];
Forpaper3CSpecfig = ListPlot[Forpaper3CSpec[[1 ;; 4, All, 4 ;; 5]], PlotRange -> Full,
  (*PlotLegends->Placed[SwatchLegend[SwatchLabelsForpaper2CSpec,
    LegendLayout->"Row"],{{0.8,-0.15},{0.8,-0.15}}],*)
  PlotStyle -> {Red, Brown, LightBlue, Gray, Pink, Cyan, Magenta, Yellow,
    Green, Orange, Purple, Lighter[Purple, 0.5], Lighter[Pink, 0.5],
    Lighter[Blue, 0.5], Lighter[Black, 0.75], Lighter[Brown, 0.3]},
  AxesLabel -> {Time - sec, Absorbance - AU}, Frame -> True,
  FrameLabel -> {"Time (s)", "Absorbance" (*,"FNIII 3C Spectrophotometer data"*)},
  LabelStyle -> {(FontFamily -> "Arial"), 12},
  FrameTicks -> {Automatic, Automatic, None, None}];
FitPlotsForpaper3CSpec = Plot[
  {Signal[Forpaper3CSpec[[1, 1, 2]], Forpaper3CSpec[[1, 1, 3]], t},
  Signal[Forpaper3CSpec[[2, 1, 2]], Forpaper3CSpec[[2, 1, 3]], t},
  Signal[Forpaper3CSpec[[3, 1, 2]], Forpaper3CSpec[[3, 1, 3]], t},
  Signal[Forpaper3CSpec[[4, 1, 2]], Forpaper3CSpec[[4, 1, 3]], t]}, {t, 0, 1800},
  PlotStyle -> {{Dotted, Black}} (*, {Dashing[Large], Black}, {Dashed, Black},
  {Dashing[Tiny], Black}, {DotDashed, Black}, {Dashing[{Large}], Black},
  {Dashing[{Small, Large]}, Black})*, PlotRange -> Full (*, PlotLegends->
  Placed[LineLegend[{"Fit"}], LegendLayout->"Row"], {{0.3, -0.25}, {1, -0.25}}] *);
FigIII3CSpec = Show[Forpaper3CSpecfig, FitPlotsForpaper3CSpec]

```

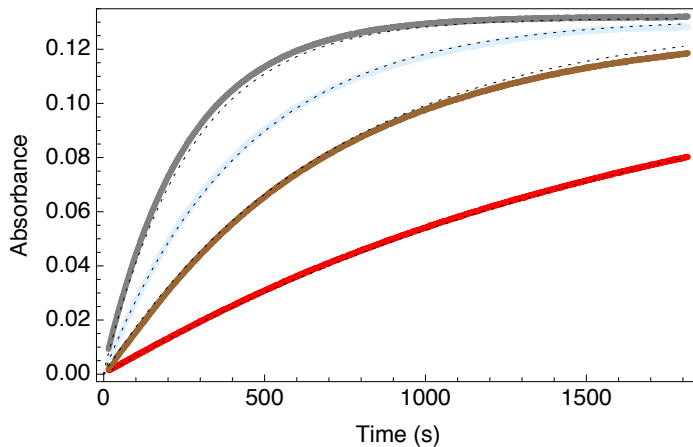

```
FigforpaperIII3CA11 = Show[Forpaper3CSpecfig,
  Forpaper3CSFfig, FitPlotsForpaper3CSpec, FitPlotsForpaper3CSF]
```

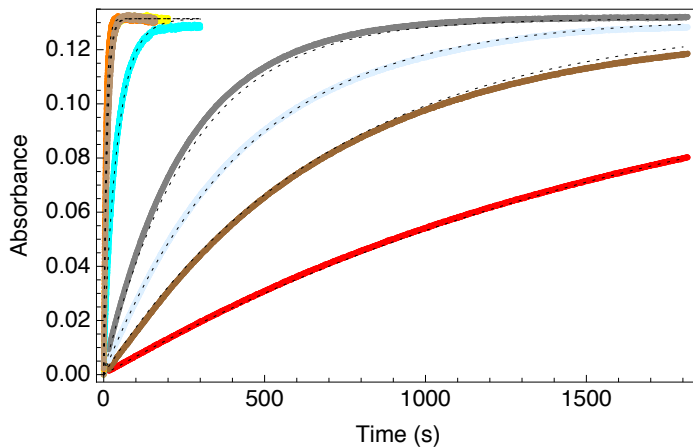

```
FigIII3Clegends = LineLegend[{Directive[Red, Thick],
  Directive[Brown, Thick], Directive[LightBlue, Thick], Directive[Gray, Thick],
  Directive[Cyan, Thick], Directive[Yellow, Thick], Directive[Orange, Thick],
  Directive[Lighter[Brown, 0.3], Thick], Directive[Orange, Thick],
  Directive[Lighter[Purple, 0.5], Thick], Directive[Lighter[Blue, 0.5], Thick],
  Directive[Lighter[Brown, 0.3], Thick], {Dotted, Black}},
  {SwatchLabelsForpaper3CSpec[[1]], SwatchLabelsForpaper3CSpec[[2]],
  SwatchLabelsForpaper3CSpec[[3]], SwatchLabelsForpaper3CSpec[[4]],
  SwatchLabelsForpaper3CSF[[1]], SwatchLabelsForpaper3CSF[[2]],
  SwatchLabelsForpaper3CSF[[3]], SwatchLabelsForpaper3CSF[[4]]},
  LegendLayout -> "Row", LabelStyle -> {FontFamily -> "Arial", 12}]
```

— 0M — 0.5M — 0.75M — 1M  
 — 2M — 3M — 4M — 8M

Plot data & fits in three dimensions (Signal vs. [urea] & t)

```
tMax = 1800;
FitPlots = Plot3D[Signal[100, i, t],
  {i, 0, 8}, {t, 0, tMax}, PlotStyle -> Red, PlotRange -> Full];
DataPlots = ListPointPlot3D[AllData[[All, All, 3 ;; 5]]];
Show[FitPlots, DataPlots]
```

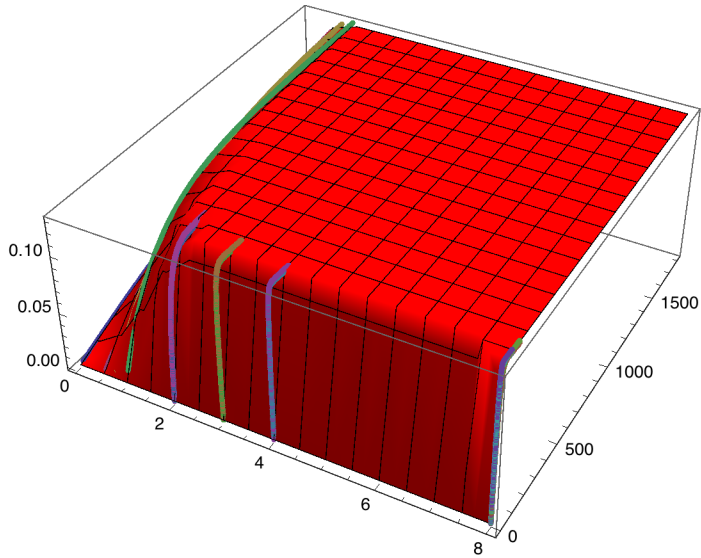

Plot simulated chevron plot ( $\ln(k_{op} + k_{cl})$  vs. [urea])

```

kop[Uconc_] := Exp[Log[kop0] + mop * Uconc];
kcl[Uconc_] := Exp[Log[kcl0] + mcl * Uconc];
kchem[Uconc_] := Exp[Log[kchem0] - 0.1 * Uconc]
III3CChevronPlot = Plot[Log[kop[Uconc] + kcl[Uconc]], {Uconc, 0, 8},
  Frame -> True, FrameLabel -> {"Urea (M)", "Log (kop+kcl)", None},
  LabelStyle -> {{FontFamily -> "Arial"}, 12},
  FrameTicks -> {Automatic, Automatic, None, None}, PlotStyle -> Red, PlotRange -> All]

```

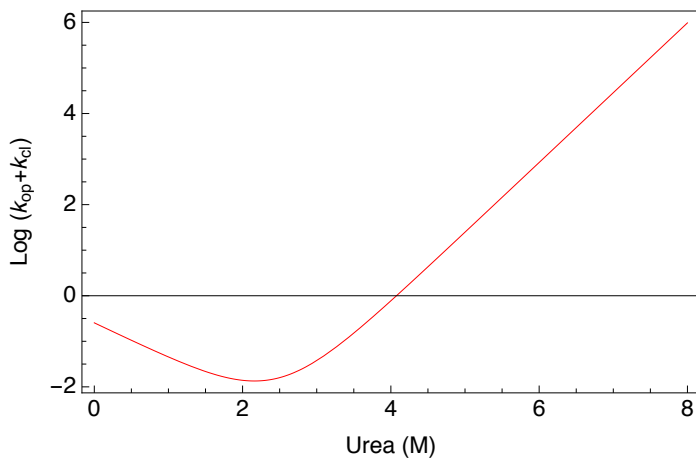

Compute  $\beta_T$

$$\beta_T = mcl / (mcl - mop)$$

0.337298

Compute  $m_{eq}$

$$m_{eq} = .6 (mcl - mop)$$

-1.38718

Compute  $K_{eq(cl)}$  at [urea] = 0

$$K_{eq} = k_{cl0} / k_{op0}$$

289.845

Compute  $K_{eq(op)}$  at [urea] = 0

$$K_{eqop} = k_{op0} / k_{cl0}$$

0.00345012

Compute  $c^{1/2}$

$$\text{Log}[K_{eqop}] / (m_{cl} - m_{op})$$

2.45218

Compute  $\Delta G_{op}$  at [urea] = 0

$$\text{DeltaGop} = .6 \text{Log}[k_{cl0} / k_{op0}]$$

3.40161

Compute number of residues exposed in TS for opening

$$m_{eq} = 374 + .11 \text{ASA};$$

$$\text{ASA} = -907 + 93 \text{Nres};$$

$$\text{ResidueNo} = \text{Solve}[m_{eq} == -1.38, \text{Nres}]$$

{ {Nres → -26.9413} }

Compute folded/closed state lifetime (in seconds)

$$\text{Closedlifetime} = 1 / k_{op0}$$

527.17

Compute folded/closed state halflifetime (in seconds)

$$\text{Closedhalflifetime} = 0.693 / k_{op0}$$

365.329

Compute open state lifetime (in seconds)

$$\text{Openlifetime} = 1 / k_{cl0}$$

1.8188

## Compute open state halflifetime (in seconds)

**Openhalflifetime = 0.693 / kcl0**

1.26043

## Error propagation in computed parameters

|        | Estimate   | Standard Error | t-Statistic | P-Value                           |
|--------|------------|----------------|-------------|-----------------------------------|
| kop0   | 0.00189692 | 0.000024229    | 78.2914     | $5.2202203229 \times 10^{-1203}$  |
| kcl0   | 0.549814   | 0.0101957      | 53.9261     | $1.7930696462 \times 10^{-602}$   |
| mcl    | -0.779821  | 0.00957587     | -81.436     | $2.2847892514 \times 10^{-1291}$  |
| mop    | 1.53215    | 0.00660216     | 232.067     | $4.6959320602 \times 10^{-6452}$  |
| kchem0 | 2074.45    | 2.24013        | 926.041     | $1.3967447643 \times 10^{-20568}$ |
| AbsMax | 0.131449   | 0.0000140488   | 9356.57     | $4.8787523498 \times 10^{-47706}$ |

**R1 = 1 / x;**

**R2 = 1 / y;**

**R3 = y / x;**

**R4 = .6 Log[y / x];**

**R5 = .6 (y - x);**

**R6 = 0.693 / x;**

**R7 = 0.693 / y;**

**R8 = x / y;**

**R9 = y / (y - x);**

**deltax = 0.000024;**

**deltay = 0.010195696724145418`;**

**deltax = 0.006602159099735208`;**

**deltav = 0.009575867475265872`;**

**ErrorClosed = Sqrt[Power[D[R1, x] \* deltax, 2]]**

$$0.000024 \sqrt{\frac{1}{x^4}}$$

**ErrorHalfClosed = Sqrt[Power[D[R6, x] \* deltax, 2]]**

$$0.000016632 \sqrt{\frac{1}{x^4}}$$

**ErrorOpen = Sqrt[Power[D[R2, y] \* deltay, 2]]**

$$0.0101957 \sqrt{\frac{1}{y^4}}$$

**ErrorHalfOpen = Sqrt[Power[D[R7, y] \* deltay, 2]]**

$$0.00706562 \sqrt{\frac{1}{y^4}}$$

**ErrorKeq = Sqrt[Power[D[R3, x] \* deltax, 2] + Power[D[R3, y] \* deltay, 2]]**

$$\sqrt{\frac{0.000103952}{x^2} + \frac{5.76 \times 10^{-10} y^2}{x^4}}$$

$$\mathbf{ErrorKegop} = \mathbf{Sqrt}[\mathbf{Power}[\mathbf{D}[\mathbf{R8}, \mathbf{x}] * \mathbf{deltax}, 2] + \mathbf{Power}[\mathbf{D}[\mathbf{R8}, \mathbf{y}] * \mathbf{deltay}, 2]]$$

$$\sqrt{\frac{0.000103952 x^2}{y^4} + \frac{5.76 \times 10^{-10}}{y^2}}$$

$$\mathbf{ErrordeltaG} = \mathbf{Sqrt}[\mathbf{Power}[\mathbf{D}[\mathbf{R4}, \mathbf{x}] * \mathbf{deltax}, 2] + \mathbf{Power}[\mathbf{D}[\mathbf{R4}, \mathbf{y}] * \mathbf{deltay}, 2]]$$

$$\sqrt{\frac{2.0736 \times 10^{-10}}{x^2} + \frac{0.0000374228}{y^2}}$$

$$\mathbf{Errormeq} = \mathbf{Sqrt}[\mathbf{Power}[\mathbf{D}[\mathbf{R5}, \mathbf{x}] * \mathbf{deltax}, 2] + \mathbf{Power}[\mathbf{D}[\mathbf{R5}, \mathbf{y}] * \mathbf{deltay}, 2]]$$

$$0.00611743$$

$$\mathbf{ErrorBT} = \mathbf{Sqrt}[\mathbf{Power}[\mathbf{D}[\mathbf{R9}, \mathbf{x}] * \mathbf{deltax}, 2] + \mathbf{Power}[\mathbf{D}[\mathbf{R9}, \mathbf{y}] * \mathbf{deltay}, 2]]$$

$$\sqrt{\left( \frac{5.76 \times 10^{-10} y^2}{(-x+y)^4} + 0.000103952 \left( -\frac{y}{(-x+y)^2} + \frac{1}{-x+y} \right)^2 \right)}$$

### 1. Closed state lifetime (in seconds)

$$\mathbf{x} = \mathbf{kop0};$$

$$\mathbf{y} = \mathbf{kcl0};$$

$$\mathbf{ErrorClosed} = 0.000024 \sqrt{\frac{1}{x^4}}$$

$$6.66979$$

### 2. Open state lifetime (in seconds)

$$\mathbf{ErrorOpen} = 0.010195696724145418 \sqrt{\frac{1}{y^4}}$$

$$0.0337276$$

### 3. $K_{eq(cl)} \text{ at}[\text{urea}] = 0$

$$\sqrt{\left( \frac{0.0001039522316907496}{x^2} + \frac{5.760000000000001 \cdot 10^{-10} y^2}{x^4} \right)}$$

$$6.5067$$

4.  $\Delta G_{op}$  at[urea] = 0

$$\sqrt{\left(\frac{2.0735999999999997 \cdot 10^{-10}}{x^2} + \frac{0.000037422803408669855}{y^2}\right)}$$

0.0134693

5. meq

**Errormeq**

0.00611743

6. Closed state halflife (in seconds)

$$\text{ErrorHalfClosed} = 0.000016632 \cdot \sqrt{\frac{1}{x^4}}$$

4.62217

7. Open state halflife (in seconds)

$$\text{ErrorHalfOpen} = 0.007065617829832774 \cdot \sqrt{\frac{1}{y^4}}$$

0.0233732

8.  $K_{eq(op)}$  at[urea] = 0

$$\text{ErrorKeqop} = \sqrt{\left(\frac{0.0001039522316907496 \cdot x^2}{y^4} + \frac{5.760000000000001 \cdot 10^{-10}}{y^2}\right)}$$

0.0000774512

9.  $\beta_T$

**Error $\beta_T$**  =

$$\sqrt{\left(\frac{5.760000000000001 \cdot 10^{-10} y^2}{(-x+y)^4} + 0.0001039522316907496 \cdot \left(-\frac{y}{(-x+y)^2} + \frac{1}{-x+y}\right)^2\right)}$$

0.0000779885

## Convert to output form & export as .pdf

### I. Output form for all the parameters & associated statistics

```
Output3C = Grid[{{"Parameters at OM Urea", "Value", "Error"},
  {"kop (s-1)", kop0, deltax}, {"kcl (s-1)", kcl0, deltax},
  {"Closed state half-life(s)", Closedhalflifetime, ErrorHalfClosed},
  {"Open state half-life(s)", Openhalflifetime, ErrorHalfOpen},
  {"mcl", mcl, deltax}, {"mop", mop, deltax}, {"ΔGop (kcal/mol)", DeltaGop,
  ErrordeltaG}, {"Keq (op)", Keqop, ErrorKeqop}, {"meq", meq, Errormeq},
  {"βT", βT, ErrorβT}, {"Simulated Chevron Plot", III3CChevronPlot, ""}},
  Frame → All, Alignment → {Left}, Background →
  {{None, None} (*{Gray,White,Gray,White,Gray,White,Gray,White,Gray,White}*)},
  ItemStyle → {{Automatic, Automatic, Automatic} (*{White, Automatic,
  White, Automatic, White, Automatic, White, Automatic}*)
  (*, {{4, 2} → Blue, {5, 2} → Red}*)}, Spacings → {0.75, 1}]
```

| Parameters at OM Urea              | Value                                                                               | Error        |
|------------------------------------|-------------------------------------------------------------------------------------|--------------|
| k <sub>op</sub> (s <sup>-1</sup> ) | 0.00189692                                                                          | 0.000024     |
| k <sub>cl</sub> (s <sup>-1</sup> ) | 0.549814                                                                            | 0.0101957    |
| Closed state half-life(s)          | 365.329                                                                             | 4.62217      |
| Open state half-life(s)            | 1.26043                                                                             | 0.0233732    |
| m <sub>cl</sub>                    | -0.779821                                                                           | 0.00957587   |
| m <sub>op</sub>                    | 1.53215                                                                             | 0.00660216   |
| ΔG <sub>op</sub> (kcal/mol)        | 3.40161                                                                             | 0.0134693    |
| K <sub>eq (op)</sub>               | 0.00345012                                                                          | 0.0000774512 |
| meq                                | -1.38718                                                                            | 0.00611743   |
| β <sub>T</sub>                     | 0.337298                                                                            | 0.0000779885 |
| Simulated Chevron Plot             | 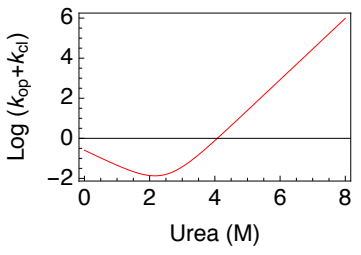 |              |

## Experimental simulation & design

Simulate transients as a function of [urea], with reagent concentration dependent on [urea]

```
Rconc[R_, UreaConc_] := R / 10UreaConc;
tMax = 1800;
Plot3D[Signal[Rconc[100, UreaConc], UreaConc, t],
  {UreaConc, 0, 3}, {t, 0, tMax}, PlotStyle → Red, PlotRange → Automatic]
```



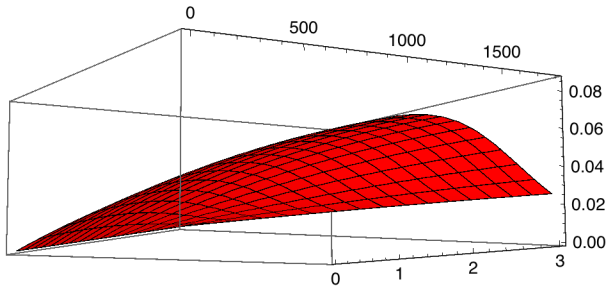

### Simulate kobs vs. [R] curves at various [urea]

```

kobs[Rconc_, Uconc_] := Module[{kop, kcl, kchem},

  kop = Exp[Log[kop0] + mop * Uconc];
  kcl = Exp[Log[kcl0] + mcl * Uconc];
  kchem = Exp[Log[kchem0] - 0.1 * Uconc];

  RateMatrix =  $\begin{pmatrix} -kop & kcl & 0 \\ kop & -kcl - Rconc * kchem & 0 \\ 0 & Rconc * kchem & 0 \end{pmatrix}$ ;
  Eigenvalues[RateMatrix]

  kobsPlots = Table[Plot[-kobs[10-6 Rconc, Uconc][[2]] 600, {Rconc, 0, 500},
    PlotRange → Full, AxesLabel → {"[DTNB] (uM)", "kobs (s-1)"},
    PlotLabel → Style["[urea] = " <> ToString[Uconc] <> " M",
      Bold, FontFamily → "Arial"], {Uconc, 0, 5.5, 0.5}];

  k = 0;
  GraphicsGrid[Table[k++;
    kobsPlots[[k]], {i, 3}, {j, i, i + 3}], ImageSize → 1000]

```

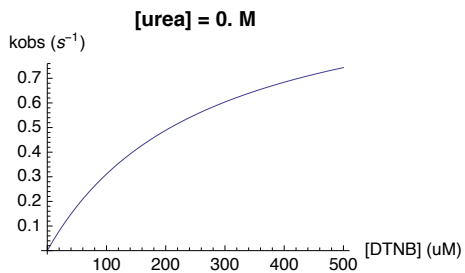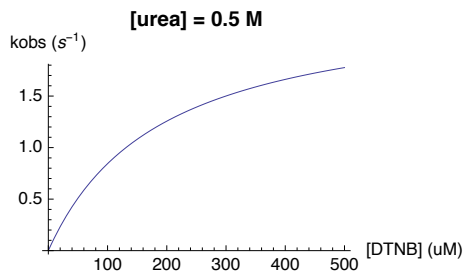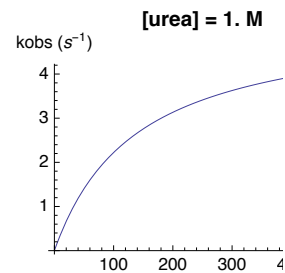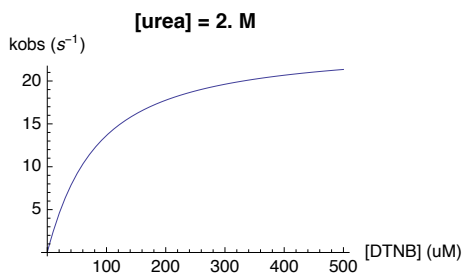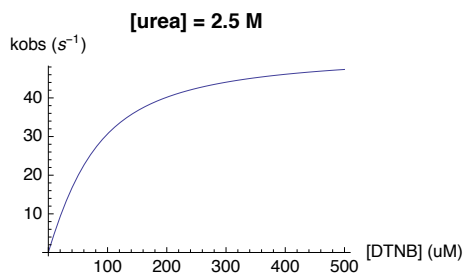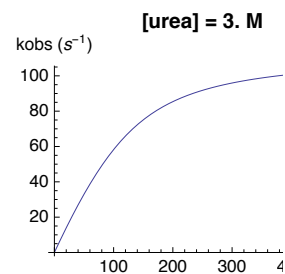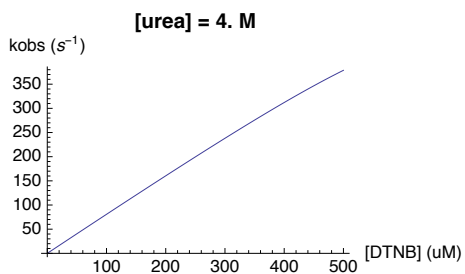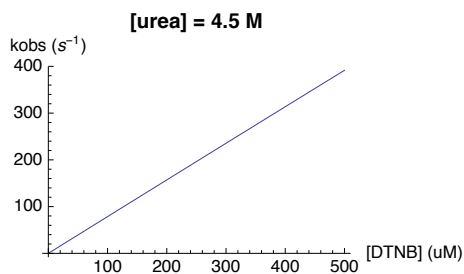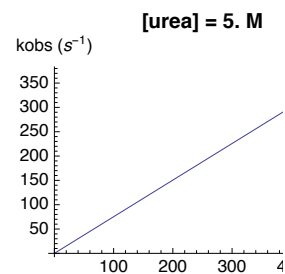

## Classification of kinetic regimes in diff Urea Conc

```

kop0 = kop0;
kcl0 = kcl0;
mop = mop;
mcl = mcl;
kop = Exp[Log[kop0] + mop * Uconc];
kcl = Exp[Log[kcl0] + mcl * Uconc];
kchem = Exp[Log[kchem0] - 0.1 * Uconc];
Uconc = DeleteDuplicates[Flatten[Join[UreaConc, UreaConcSF1]]];
Rconc = 10-4;
kint = Rconc * kchem;
Regimes = Table[If[kcl[[i]] ≥ 10 (kint[[i]]), "EX2", If[
  10 (kcl[[i]]) ≤ kint[[i]], "EX1", "EXX", {i, Length[kcl]}]], {i, Length[kcl]}];
Ureaconc = Flatten[{"Urea Conc (M)", Uconc}];
Regime = Flatten[{"Kinetic Regime", Regimes}];
(*EX2=kcl>>kint (10X>>1X)
EX1=kcl <<kint (1X <<10X)
EXX=Diff between kcl& kint<10X
EXX→EX1=EXX close to EX1
EXX→EX2=EXX close to EX2
Beyond E\ .18X1:kobs=kint*)
OutputRegimes3C = Grid[{Table[Ureaconc[[i]], {i, Length[Ureaconc]}],
  Table[Regime[[i]], {i, Length[Ureaconc]}], Frame → All,
  Alignment → {Left}, Background → {{Gray, LightBlue, LightBlue,
  LightBlue, LightBlue, LightBlue, LightBlue, LightGreen}},
  ItemStyle → {{White}, {Automatic}, {Blue}, {Green}}, Spacings → {1, 1}]

```

|                |     |     |      |     |     |     |     |     |
|----------------|-----|-----|------|-----|-----|-----|-----|-----|
| Urea Conc (M)  | 0   | 0.5 | 0.75 | 1   | 2   | 3   | 4   | 8   |
| Kinetic Regime | EXX | EXX | EXX  | EXX | EXX | EXX | EXX | EX1 |

## Exporting data to .pdf format

```

Export["FigforpaperIII3Cfinal.pdf", FigforpaperIII3C];
Export["FigIII3Clegendsfinal.pdf", FigIII3Clegends];
Export["FigIII3CSpecfinalfit.pdf", FigIII3CSpec];
Export["FigIII3CSFfinalfit.pdf", FigIII3CSF];
Export["III3Cfinalparameters.pdf", Output3C];
Export["Forpaper3Callfinalfit.pdf", FigforpaperIII3CAll];
Export["III3Ckineticregimefinal.pdf", OutputRegimes3C];

```
